# Supplementary material
Source: PubMed Central journal article supplement (PMC6519214)
Supplement: CNCR-125-1470-s008.pdf [file CNCR-125-1470-s008.pdf]

| AML   | Marrow # | Age (5F 8M, median 53) | CD3%   | CD34 IHC                                                            | overall cellularity      | flow CD34                    | CD3 description                         |
|-------|----------|------------------------|--------|---------------------------------------------------------------------|--------------------------|------------------------------|-----------------------------------------|
| PE-1  | 1        | 45                     | 30-40% | 5-10% overall, focal areas up to 20%                                | less than 5%             | ND                           | scattered                               |
| PE-1  | 2        | 46                     | 60-70% | 7%                                                                  | 5-15%                    | less than 1%                 | Diffuse interstitial infiltrate         |
| PE-3  | 1        | 64                     | ~10%   | 30%                                                                 | 50-60% (variable 10-80%) | 19%                          | scattered                               |
| PE-3  | 2        | 64                     | ~10%   | 25%                                                                 | 40-60%                   | 36%                          | scattered                               |
| PE-4  | 1        | 62                     | ~15%   | 30-40%                                                              | 80-90%                   | 28% (hemodiluted)            | scattered with focal small aggregation  |
| PE-4  | 2        | 62                     | ~15%   | 80%                                                                 | 30-40%                   | 84%                          | scattered with focal small aggregation  |
| PE-7  | 1        | 38                     | 15-20% | 40-50%                                                              | 60% (variable 30-80%)    | ND                           | scattered with focal small aggregations |
| PE-7  | 2        | 39                     | 15-20% | less than 5%                                                        | 30-40%                   | 0.20%                        | scattered with focal small aggregations |
| PE-9  | 1        | 66                     | 15-20% | 10-20%                                                              | 60% (variable 60-80%)    | ND                           | scattered                               |
| PE-9  | 2        | 66                     | 30-50% | less than 1%                                                        | 5%                       | less than 0.1% blasts        | scattered with focal small aggregations |
| PE-10 | 1        | 53                     | ~10%   | 50-60%                                                              | 90-100%                  | 46%                          | scattered with focal small aggregations |
| PE-10 | 2        | 53                     | 5-10%  | 20-30% (but extensive CD34-negative dysplastic myeloid progenitors) | over 90%                 | 37%                          | scattered                               |
| PE-11 | 1        | 46                     | 15-20% | 70%                                                                 | 60-70%                   | 84%                          | scattered with focal small aggregations |
| PE-12 | 1        | 23                     | 10-15% | 40%                                                                 | 40-50%                   | 35%                          | scattered with focal small aggregation  |
| PE-12 | 2        | 23                     | 5-10%  | 20%                                                                 | 10%                      | 20%                          | scattered with focal small aggregations |
| PE-13 | 1        | 68                     | 10-15% | 35-40%                                                              | 70% (variable 20-90%)    | 13% but markedly hemodilute  | scattered with focal small aggregation  |
| PE-13 | 2        | 69                     | 15-20% | 80-90%                                                              | 80%                      | 44%                          | scattered with focal large aggregate    |
| PE-14 | 1        | 50                     | 5-10%  | less than 5% (but 60-70% CD34-negative abnormal cells)              | 60% (variable 20-80%)    | blasts are CD34 negative     | scattered                               |
| PE-14 | 2        | 50                     | <5%    | less than 5%                                                        | 50-70%                   | no abnormal blasts           | scattered                               |
| PE-17 | 1        | 68                     | 20-30% | 60%                                                                 | variable 30-90%          | 55%                          | scattered with focal large aggregation  |
| PE-17 | 2        | 68                     | 20%    | 60-70%                                                              | 60%                      | 50%                          | scattered with focal large aggregation  |
| PE-18 | 1        | 30                     | 5-10%  | 10-20% (blasts are partial 26% positive for CD34)                   | 60-70%                   | 8% with minimal hemodilution | scattered                               |
| PE-18 | 2        | 30                     | 20-30% | less than 5%                                                        | 30%                      | 0.30%                        | scattered with focal large aggregation  |
| PE-19 | 1        | 62                     | 5-10%  | 40-50% by CD117                                                     | 50% (variable 5-80%)     | 38% CD34- blasts             | scattered                               |
| PE-19 | 2        | 63                     | 10%    | 10% by CD117                                                        | 5-10%                    | 9%                           | scattered                               |

| Healthy donor | Age (9F 6M, median 56) | CD3%   | CD34 IHC | overall cellularity   | flow CD34 | CD3 description                        |
|---------------|------------------------|--------|----------|-----------------------|-----------|----------------------------------------|
|               | 59                     | 20%    |          | 40% (variable 10-50%) |           | scattered with focal large aggregation |
|               | 47                     | 10-15% |          | 30-40%                |           | interstitial                           |
|               | 60                     | 10%    |          | 30-40%                |           | scattered with focal small aggregation |
|               | 41                     | 15-20% |          | 70%                   |           | scattered with focal small aggregation |
|               | 50                     | 10%    |          | 50-60%                |           | interstitial                           |
|               | 43                     | 15-20% |          | ND                    |           | scattered with focal large aggregation |
|               | 84                     | 10-15% |          | 20% (5-30%)           |           | scattered with focal small aggregation |
|               | 57                     | 5-10%  |          | 50%                   |           | scattered                              |
|               | 50                     | 10%    |          | 20-30%                |           | interstitial                           |
|               | 58                     | 10%    |          | 50-60%                |           | scattered with focal small aggregation |
|               | 67                     | 20%    |          | 10-35%                |           | scattered with focal large aggregation |
|               | 58                     | 15%    |          | 50%                   |           | scattered with focal small aggregation |
|               | 56                     | 10-15% |          | 30-50%                |           | scattered with focal small aggregation |
|               | 24                     | 10-15% |          | 30-70%                |           | interstitial                           |
|               | 46                     | 15-20% |          | 40-60%                |           | scattered with focal small aggregation |
